# Supplementary material for: Phylogenetic analyses of complete mitochondrial genome sequences suggest a basal divergence of the enigmatic rodent Anomalurus
Source: PubMed Central journal article supplement (PMC1802082; doi:10.1186/1471-2148-7-16), 2007-02-08
Supplement: 1471-2148-7-16-S1.pdf [file 1471-2148-7-16-S1.pdf]

| Organism                       | Accession | classification                      | Common name                  |
|--------------------------------|-----------|-------------------------------------|------------------------------|
| <i>Anomalurus sp.</i>          | AM159537  | Rodentia / Anomaluridae             | Scaly tailed flying squirrel |
| <i>Canis familiaris</i>        | NC_002008 | Laurasiatheria OUTGROUP             | dog                          |
| <i>Cavia porcellus</i>         | NC_000884 | Rodentia / Hystricognathi           | domestic guinea pig          |
| <i>Cebus albifrons</i>         | NC_002763 | Primates / Haplorrhini              | white-fronted capuchin       |
| <i>Chlorocebus aethiops</i>    | NC_007009 | Primates / Haplorrhini              | African green monkey         |
| <i>Chlorocebus sabaeus</i>     | NC_008066 | Primates / Haplorrhini              | green monkey                 |
| <i>Colobus guereza</i>         | NC_006901 | Primates / Haplorrhini              | guereza                      |
| <i>Cricetulus griseus</i>      | NC_007936 | Rodentia / Sciurognathi / Muroidea  | Chinese hamster              |
| <i>Cynocephalus variegatus</i> | NC_004031 | Dermoptera                          | Malayan flying lemur         |
| <i>Cynocephalus variegatus</i> | AJ428849  | Dermoptera                          | Malayan flying lemur         |
| <i>Gorilla gorilla</i>         | NC_001645 | Primates / Haplorrhini              | gorilla                      |
| <i>Homo sapiens</i>            | NC_001807 | Primates / Haplorrhini              | human                        |
| <i>Hylobates lar</i>           | NC_002082 | Primates / Haplorrhini              | common gibbon                |
| <i>Jaculus jaculus</i>         | NC_005314 | Rodentia / Sciurognathi / Dipodidae | lesser Egyptian jerboa       |
| <i>Lemur catta</i>             | NC_004025 | Primates / Strepsirrhini            | ring-tailed lemur            |
| <i>Lepus europaeus</i>         | NC_004028 | Lagomorpha                          | European hare                |
| <i>Macaca mulatta</i>          | NC_005943 | Primates / Haplorrhini              | rhesus monkey                |
| <i>Macaca sylvanus</i>         | NC_002764 | Primates / Haplorrhini              | Barbary ape                  |
| <i>Microtus kikuchii</i>       | NC_003041 | Rodentia / Sciurognathi / Muroidea  | Taiwan vole                  |
| <i>Mus musculus</i>            | NC_005089 | Rodentia / Sciurognathi / Muroidea  | house mouse                  |
| <i>Mus musculus domesticus</i> | NC_006914 | Rodentia / Sciurognathi / Muroidea  | western European house mouse |
| <i>Mus musculus molossinus</i> | NC_006915 | Rodentia / Sciurognathi / Muroidea  | Japanese wild mouse          |
| <i>Myoxus glis</i>             | NC_001892 | Rodentia / Sciurognathi / Myoxidae  | fat dormouse                 |
| <i>Nannospalax ehrenbergi</i>  | NC_005315 | Rodentia / Sciurognathi / Muroidea  | Ehrenberg's mole-rat         |
| <i>Nycticebus coucang</i>      | NC_002765 | Primates / Strepsirrhini /          | slow loris                   |
| <i>Ochotona collaris</i>       | NC_003033 | Lagomorpha                          | collared pika                |
| <i>Ochotona princeps</i>       | NC_005358 | Lagomorpha                          | American pika                |
| <i>Oryctolagus cuniculus</i>   | NC_001913 | Lagomorpha                          | rabbit                       |
| <i>Ovis aries</i>              | NC_001941 | Laurasiatheria OUTGROUP             | sheep                        |
| <i>Pan paniscus</i>            | NC_001644 | Primates / Haplorrhini              | pygmy chimpanzee             |
| <i>Pan troglodytes</i>         | NC_001643 | Primates / Haplorrhini              | chimpanzee                   |
| <i>Papio hamadryas</i>         | NC_001992 | Primates / Haplorrhini              | hamadryas baboon             |
| <i>Pongo pygmaeus</i>          | NC_001646 | Primates / Haplorrhini              | orangutan                    |
| <i>Pongo pygmaeus abelii</i>   | NC_002083 | Primates / Haplorrhini              | Sumatran orangutan           |
| <i>Rattus norvegicus</i>       | NC_001665 | Rodentia / Sciurognathi / Muroidea  | Norway rat                   |
| <i>Sciurus vulgaris</i>        | NC_002369 | Rodentia / Sciurognathi / Sciuridae | Eurasian red squirrel        |
| <i>Talpa europaea</i>          | NC_002391 | Laurasiatheria OUTGROUP             | European mole                |
| <i>Tarsius bancanus</i>        | NC_002811 | Primates / Haplorrhini              | western tarsier              |
| <i>Thryonomys swinderianus</i> | NC_002658 | Rodentia / Hystricognathi           | greater cane rat             |
| <i>Trachypithecus obscurus</i> | NC_006900 | Primates / Haplorrhini              | dusky leaf monkey            |
| <i>Tupaia belangeri</i>        | NC_002521 | Scandentia / Tupaiidae              | northern tree shrew          |
